# Supplementary material for: Improvement of Laccase Production by Thielavia terrestris Co3Bag1. Enhancing the Bio-Catalytic Performance of the Native Thermophilic TtLacA via Immobilization in Copper Alginate Gel Beads
Source: MDPI journal article supplement (doi:10.3390/jof9030308), 2023-02-28
Supplement: s1 [file s1]

**Table S1.** Comparison biochemical properties of free and immobilized *Tl*LacA and others laccases

| Strain/<br>Laccase name/substrate  | MW<br>(kDa) | Support                                                 | Optimal<br>Temperature (°C) |         | Thermal stability<br>(Relative<br>activity %)     |                                                    | Optimal<br>pH |     | $K_m$<br>( $\mu$ M)              |                     | $V_{max}$<br>( $\mu$ Mmin <sup>-1</sup> )       |                                                             | $K_{cat}$<br>(s <sup>-1</sup> ) |        | $k_{cat}/K_m$<br>(s <sup>-1</sup> $\mu$ M <sup>-1</sup> ) |        | Storage stability<br>(Residual<br>activity %/Time)                                  |                                           | Reusabilit<br>y<br>(Relative<br>activity %/<br>Cycles<br>reuse) | Reference |
|------------------------------------|-------------|---------------------------------------------------------|-----------------------------|---------|---------------------------------------------------|----------------------------------------------------|---------------|-----|----------------------------------|---------------------|-------------------------------------------------|-------------------------------------------------------------|---------------------------------|--------|-----------------------------------------------------------|--------|-------------------------------------------------------------------------------------|-------------------------------------------|-----------------------------------------------------------------|-----------|
|                                    |             |                                                         | Free                        | Imm     | Free                                              | Imm                                                | Free          | Imm | Free                             | Imm                 | Free                                            | Imm                                                         | Free                            | Imm    | Free                                                      | Imm    | Free                                                                                | Imm                                       | Imm                                                             |           |
| <i>Chaetomium</i> sp. /-/**        | 68          | -                                                       | 60                          | -       | 85 %, 50 °C, 90 min                               | -                                                  | 3.0           | -   | 10.2                             | -                   | -                                               | -                                                           | -                               | -      | -                                                         | -      | -                                                                                   | -                                         | -                                                               | [57]      |
| <i>G. australe</i> /Galacc-F/*     | 48          | -                                                       | 55                          | -       | -                                                 | -                                                  | 6.0           | -   | 164.137                          | -                   | -                                               | -                                                           | 273                             | -      | 1.663                                                     | -      | -                                                                                   | -                                         | -                                                               | [52]      |
| <i>G. luxurians</i> /GGL/*         | 64          | -                                                       | 55-65                       | -       | 63 %, 50 °C, 60 min<br>52 %, 60 °C, 240 min       | -                                                  | 2.2           | -   | 539                              | -                   | -                                               | -                                                           | -                               | -      | -0.140<br>140 (s <sup>-1</sup> mM <sup>-1</sup> )         | -      | -                                                                                   | -                                         | -                                                               | [59]      |
| <i>P. variable</i> /PvL/*          | 84          | -                                                       | 50                          | -       | 50 %, 50 °C, 60 min                               | -                                                  | 4.8           | -   | 203                              | -                   | 40                                              | -                                                           | -                               | -      | -                                                         | -      | 80 / 1 day <sup>b</sup>                                                             | -                                         | -                                                               | [51]      |
| <i>T. polyzona</i> WRF03/TpL/*     | 66          | -                                                       | 65                          | -       | 42.92 %, 50 °C, 120 min                           | -                                                  | 4.5           | -   | 8.66                             | -                   | 1429                                            | -                                                           | -                               | -      | -                                                         | -      | -                                                                                   | -                                         | -                                                               | [49]      |
| <i>T. harzianum</i> S7113/LacA/*   | 63          | -                                                       | 50                          | -       | 50 %, 40 °C, 180 min                              | -                                                  | 3.0           | -   | 100<br>0.100 mM                  | -                   | 0.603                                           | -                                                           | -                               | -      | -                                                         | -      | -                                                                                   | -                                         | -                                                               | [77]      |
| <i>T. trogii</i> S0301/Lac 37 II/* | 56          | -                                                       | 60                          | -       | 50 %, 60 °C, > 360 min<br>50 %, 70 °C, > 120 min  | -                                                  | 2.7           | -   | 16.1                             | -                   | -                                               | -                                                           | 2.977                           | -      | 184.9                                                     | -      | -                                                                                   | -                                         | -                                                               | [67]      |
| <i>Thielavia</i> sp./-/**          | 70          | -                                                       | 70                          | -       | -                                                 | -                                                  | 5.0           | -   | 23.7                             | -                   | -                                               | -                                                           | 4.14                            | -      | 0.1743                                                    | -      | -                                                                                   | -                                         | -                                                               | [48]      |
| <i>C. fabianii</i> /-/*            | 52          | calcium alginate gel beads<br>copper alginate gel beads | 60<br>40                    | -<br>50 | -<br>-                                            | -<br>-                                             | 6.0<br>6.0    | -   | 78<br>32<br>0.078 mM<br>0.032 mM | -<br>91<br>0.091 mM | 0.00698<br>0.015<br>15.0<br>mMmin <sup>-1</sup> | 6.98 mMm <sup>-1</sup><br>0.00561<br>5.61 mMm <sup>-1</sup> | -<br>-<br>-                     | -<br>- | -<br>-                                                    | -<br>- | 74 / 21 days <sup>b</sup><br>62 / 21 days <sup>b</sup><br>67 / 21 days <sup>b</sup> | 55/ 4 <sup>a</sup><br>60 / 4 <sup>a</sup> | -                                                               | [10]      |
| <i>M. thermophila</i> /-/*         | -           | carbon nanotube membrane                                | 70                          | 70      | 26.66 %, 50 °C, 240 min<br>1.86 %, 60 °C, 240 min | 72.93 %, 50 °C, 240 min<br>23.12 %, 50 °C, 240 min | 3.0           | 3.0 | -                                | -                   | -                                               | -                                                           | -                               | -      | -                                                         | -      | -                                                                                   | -                                         | 95 / 10<br>(25 °C, pH 4.5)                                      | [61]      |
| <i>T. pubescens</i> /Tplac/*       | 68          | chitosan beads                                          | 50                          | 60      | -                                                 | -                                                  | 4.5           | 5.0 | -                                | -                   | -                                               | -                                                           | -                               | -      | -                                                         | -      | 15 / 30 days <sup>a</sup>                                                           | 40 / 30 days <sup>a</sup>                 | ≥ 60 / 6 <sup>a</sup>                                           | [50]      |

|                                          |    |                            |    |    |                                                |                                                  |     |                 |                |                                        |                                      |           |       |      |       |                                          |                                           |                                     |                                  |            |
|------------------------------------------|----|----------------------------|----|----|------------------------------------------------|--------------------------------------------------|-----|-----------------|----------------|----------------------------------------|--------------------------------------|-----------|-------|------|-------|------------------------------------------|-------------------------------------------|-------------------------------------|----------------------------------|------------|
| <i>T. versicolor/</i> _***               | -  | copper alginate gel beads  | -  | -  | -                                              | -                                                | -   | 2210<br>2.21 mM | 560<br>0.56 mM | 0.00543<br>5.43<br>mMmin <sup>-1</sup> | 0.04464<br>44.64 mMmin <sup>-1</sup> | -         | -     | -    | -     | 46.18/ 15<br>days <sup>b</sup><br>(pH 5) | 66.19 / 15<br>days <sup>b</sup><br>(pH 5) | 21.5 / 5<br>NR                      | [81]                             |            |
| <i>Bacillus</i> sp. MSK-01/-/*           | -  | copper alginate gel beads  | 85 | 75 | 50 %, 70 °C,<br>inactive                       | 50 %, 70 °C,<br>240 min                          | 8.0 | 10              | -              | -                                      | -                                    | -         | -     | -    | -     | -                                        | > 90 / 15<br>days <sup>b</sup>            | 100 / 4                             | (75 °C, pH 8)                    | [26]       |
| <i>T. harzianum</i> HZN10/-/*            | -  | calcium alginate gel beads |    | 50 | -                                              | -                                                |     | 5.0             | -              | -                                      | -                                    | -         | -     | -    | -     |                                          | 75/8 days <sup>b</sup>                    | 36/ 6 <sup>a</sup>                  |                                  |            |
|                                          | -  | copper alginate gel beads  | 50 | 50 | -                                              | -                                                | 5.0 | 5-6             | 500<br>0.5 mM  | -                                      | -                                    | -         | -     | -    | -     | 45/8 days <sup>b</sup>                   | 33 /8 days <sup>b</sup>                   | 51/ 6 <sup>a</sup>                  |                                  | [60]       |
|                                          |    | sol gel                    |    | 50 | -                                              | -                                                |     | 4-7             | -              | 285 U/mg                               | 500 U/mg                             | -         | -     | -    | -     |                                          | 90 /8 days <sup>b</sup>                   | 82 /6 <sup>a</sup>                  |                                  |            |
| <i>T. terrestris</i><br>Co3Bag1/TiLacA/* | 70 | copper alginate gel beads  | 65 | 70 | 50 %, 60 °C, 82.9 min<br>50 %, 70 °C, 50.3 min | 50 %, 60 °C, 191.5 min<br>50 %, 70 °C, 117.2 min | 3.0 | 3.0             | 260            | 450                                    | 3.57 U/mg                            | 2.86 U/mg | 13.73 | 6.35 | 0.053 | 0.0141                                   | 36.4/12 days <sup>b</sup><br>(pH 3)       | 86.1/12 days <sup>b</sup><br>(pH 3) | 95 / six cycles<br>(60 °C, pH 3) | This study |

Imm:immobilized enzyme

\* ABTS substrate; \*\* 2,6-DMP substrate

<sup>(a)</sup> optimal temperature and pH

<sup>(b)</sup> 4 °C

NR: No registered
